# Supplementary material
Source: PubMed Central journal article supplement (PMC4178650)
Supplement: AEM.01654-14_zam999105706so1.pdf [file AEM.01654-14_zam999105706so1.pdf]

**Table S1**

General assembly characteristics of the strains

| <b>Strain</b>            | <b>Xap</b>       | <b>Xmi</b>       | <b>Xvt</b>        |
|--------------------------|------------------|------------------|-------------------|
| <b>Platform</b>          | Roche 454 GS FLX | Roche 454 GS FLX | Roche 454 GS FLX+ |
| <b>Reads</b>             | 664,349          | 770,765          | 726,914           |
| <b>Bases</b>             | 278,291,163      | 345,463,238      | 295,838,728       |
| <b>Coverage</b>          | ~55              | ~69              | ~56               |
| <b>Contigs &gt;500bp</b> | 217              | 195              | 50                |

**Table S2**

List of primers used in the study.

| S.NO  | Primer ID | Sequence(5'-3')            | Length     | Purpose                                                |
|-------|-----------|----------------------------|------------|--------------------------------------------------------|
| 1     | XC-UP1    | CTACGGCCTGGAGTCATTG        | 19         | Xanthomonadin cluster amplification from Xmi (LMG 941) |
| 2     | XC-UP2    | CCAACGGCGAGGCGATTCTT       | 20         |                                                        |
| 3     | XC-UP3    | CCAACGGCGAGGCGATTCTTAC     | 22         |                                                        |
| 4     | XC-LP2    | GGTTTCCACAGCGCCCCTATC      | 21         |                                                        |
| 5     | XC-LP3    | TCTGCTCGCCTATGGGGTGATTG    | 23         |                                                        |
| 6     | XC-LP4    | CACGCGCATTGTTGAAGG         | 18         |                                                        |
| 7     | XC-UP5    | ACCTAAAGCA CCTGAAGTCG      | 20         |                                                        |
| 8     | XC-UP6    | CCTGAAGTCG GTAGAGCACA AAT  | 23         |                                                        |
| 9     | XC-LP5    | TGACCTCGAC CAAAACCAAC      | 20         |                                                        |
| 10    | XC-LP6    | GCTGGCCTTG CACCTGTTGA      | 20         |                                                        |
| S.NO. | Primer ID | Sequence (5'-3')           | Length(bp) | Purpose                                                |
| 1     | XAM F1    | GACTCCGGCA AGAACTCAAG AACC | 24         | Integron cassette amplification from Xmi               |
| 2     | XAM F2    | ACTAGCTCAG GCACGGTCAA      | 20         |                                                        |
| 3     | XAM R1    | ATACGCCAGG TGGGTGTAGC      | 20         |                                                        |
| 4     | XAM R2    | GCTAGTCTGT GCGTCTTGTT A    | 21         |                                                        |
| S.NO. | Primer ID | Sequence (5'-3')           | Length(bp) | Purpose                                                |
| 1     | XAV F1    | GTGATCAGAG CCCTCCCCGA ACA  | 23         | Integron cassette amplification from Xvt               |
| 2     | XAV F2    | CCGAACATGG GACGAAAAT       | 19         |                                                        |
| 3     | XAV R1    | GCAGCATGGC ACCTAACAAT      | 20         |                                                        |
| 4     | XAV R2    | AGCGCCTTGA GTCTGGTGAG TC   | 22         |                                                        |
| S.NO. | Primer ID | Sequence (5'-3')           | Length(bp) | Purpose                                                |
| 1     | XAP F1    | GTCGGGCATG CTCACAATCA G    | 21         | Integron cassette amplification from Xap               |
| 2     | XAP F2    | AAGCCCACCG CCCATTTT        | 18         |                                                        |
| 3     | XAP R1    | CGCTTACGAC GGCAAATACT TCAT | 24         |                                                        |
| 4     | XAP R2    | CGGATCGAGC TGTTAGTC        | 18         |                                                        |
| 5     | XAP F3    | GCGGCCGAGC TTTGTGGTGA T    | 21         |                                                        |
| 6     | XAP F4    | CCGGTGC GCA GCTTCGACAA T   | 21         |                                                        |
| 7     | XAP F5    | CGCGGATCGG AGAACAAGCA AC   | 22         |                                                        |
| 8     | XAP R3    | GCGGTCAAAG CAGTGGATG       | 19         |                                                        |
| 9     | XAP R4    | CGCACACCAT CAACACCGCA CAT  | 23         |                                                        |
| 10    | XAP R5    | GCTGATGGCG CGTTTGAGGT TG   | 22         |                                                        |
| 11    | XAP F6    | TGCGTCATCT GGGCGTCAAC      | 20         |                                                        |
| 12    | XAP F7    | ACGCAGTGCC ACGACATTG       | 19         |                                                        |
| 13    | XAP R6    | TGCTCCAGGA TGTGAATGTG AT   | 22         |                                                        |
| S.NO. | Primer ID | Sequence (5'-3')           | Length(bp) | Purpose                                                |
| 1     | LPS F1    | GAGAAGCCCT GGCCGACCTA T    | 21         | LPS cassette amplification from Xap                    |
| 2     | LPS F2    | GGCCGTGGCA ATGATGCT        | 18         |                                                        |
| 3     | LPS R1    | CGCGCAATCA TCCGTTTACA A    | 21         |                                                        |
| 4     | LPS R2    | TTTTGCGCAA CCACAGTC        | 18         |                                                        |

**Table S3**

Relative parameter values for recombination and mutation generated by Clonal Frame

---

|                | <b>r/m</b>   | <b><math>\rho/\theta</math></b> |
|----------------|--------------|---------------------------------|
| <b>Run 1</b>   | 1.592        | 0.180                           |
| <b>Run 2</b>   | 1.629        | 0.181                           |
| <b>Run 3</b>   | 1.611        | 0.179                           |
| <b>Run 4</b>   | 1.627        | 0.182                           |
| <b>Run 5</b>   | 1.595        | 0.181                           |
| <b>Average</b> | <b>1.611</b> | <b>0.181</b>                    |

---

**Table S4**List of CRISPR elements identified in *X.axonopodis* strains

| CRISPR  |     | Contig number | CRISPR start position | CRISPR end position | CRISPR length | Direct repeat consensus          | Direct repeat length | Number of spacers |
|---------|-----|---------------|-----------------------|---------------------|---------------|----------------------------------|----------------------|-------------------|
| Xap     | I   | 15            | 50335                 | 50633               | 298           | TGGAAACGGTCAATGGCAGCATC          | 23                   | 5                 |
|         | II  | 14            | 51991                 | 52808               | 817           | GTTTCAATCCACGCGCCCGTGAGGGCGCGAC  | 31                   | 12                |
| Xvt     | I   | 6             | 181084                | 181436              | 352           | GATGCTGCCGTTGACCGTTTCCA          | 23                   | 6                 |
| Xag     | I   | 253           | 3546                  | 3844                | 298           | TGGAAACGGTCAATGGCAGCATC          | 23                   | 5                 |
| Xmi     | I   | 2             | 68069                 | 68421               | 352           | GATGCTGCCGTTGACCGTTTCCA          | 23                   | 6                 |
| Xcaw    | I   | NA            | 27400                 | 27698               | 398           | TGGAAACGGTCAATGGCAGCATC          | 23                   | 5                 |
|         | II  | NA            | 5157634               | 5158851             | 1217          | GTCGCGCCCTCACGGGCGCGTGGATTGAAAC  | 31                   | 18                |
|         | III | NA            | 5155349               | 5155579             | 230           | GGTCGCGCCCTCACGGGCGCGTGGATTGAAAC | 32                   | 3                 |
| Xac29   | I   | NA            | 27439                 | 27737               | 298           | TGGAAACGGTCAATGGCAGCATC          | 23                   | 5                 |
|         | II  | NA            | 4530049               | 4530804             |               | GTCGCGCCCTCACGGGCGCGTGGATTGAAAC  | 31                   | 11                |
| Xac     | I   | NA            | 27399                 | 27697               | 298           | TGGAAACGGTCAATGGCAGCATC          | 23                   | 5                 |
|         | II  | NA            | 4522475               | 4523694             | 1219          | GTCGCGCCCTCACGGGCGCGTGGATTGAAAC  | 31                   | 18                |
| Xml2388 | I   | 13            | 101241                | 101593              | 352           | GATGCTGCCGTTGACCGTTTCCA          | 23                   | 6                 |
| Xml-x20 | I   | 2             | 13267                 | 13565               | 298           | TGGAAACGGTCAATGGCAGCATC          | 23                   | 5                 |
| Xml-X18 | I   | 1             | 27395                 | 27693               | 298           | TGGAAACGGTCAATGGCAGCATC          | 23                   | 5                 |
| Xml1386 | I   | 6             | 81424                 | 81722               | 298           | TGGAAACGGTCAATGGCAGCATC          | 23                   | 5                 |
| Xf1     | I   | 215           | 9610                  | 9915                | 305           | GATGCTGCCGTTGACCGTTTCCACCCGCC    | 30                   | 5                 |
| Xf2     | I   | 178           | 25078                 | 25374               | 296           | GTGGAAACGGTCAACGGCAGCATC         | 24                   | 5                 |

**Table S5**

Blast matches of Condensation (C) domain and Ketosynthase (KS) domain

|                                 | Query id                   | Database match id | percent identity | align length | e-value   | pathway product              | domain class | Pathway type |
|---------------------------------|----------------------------|-------------------|------------------|--------------|-----------|------------------------------|--------------|--------------|
| <b>Condensation (C) domains</b> |                            |                   |                  |              |           |                              |              |              |
| <b>C1</b>                       | contig00013_3_7_1102_1404  | bleom4_C2_modAA   | 55               | 297          | 1.00E-96  | bleomycin                    | modAA        | NRPS         |
| <b>C2</b>                       | contig00013_2_6_29_320     | compl1_C1         | 33               | 274          | 2.00E-20  | complestatin                 | C            | NRPS         |
| <b>C3</b>                       | contig00013_3_10_11_305    | cyclo1_C8_LCL     | 29               | 291          | 6.00E-22  | cyclosporin                  | LCL          | NRPS         |
| <b>C4</b>                       | contig00013_3_14_270_566   | cyclom1C3_LCL     | 36               | 301          | 1.00E-24  | cyclomarin                   | LCL          | NRPS         |
| <b>C5</b>                       | contig00013_2_13_158_459   | liche1_C3_LCL     | 27               | 302          | 1.00E-20  | lychenicin                   | LCL          | NRPS         |
| <b>C6</b>                       | contig00013_2_13_1243_1534 | cdaps2_C3_LCL     | 33               | 299          | 5.00E-18  | calcium-dependent antibiotic | LCL          | NRPS         |
| <b>C7</b>                       | contig00013_1_17_633_913   | fengy4_C2_LCL     | 26               | 189          | 4.00E-14  | fengycin                     | LCL          | NRPS         |
| <b>C8</b>                       | contig00013_1_17_1659_1952 | bleom4_C2_modAA   | 31               | 293          | 3.00E-32  | bleomycin                    | modAA        | NRPS         |
| <b>C9</b>                       | contig00013_2_16_247_532   | bacit3_C4_DCL     | 26               | 299          | 1.00E-18  | bacitracin                   | DCL          | Hybrid       |
| <b>C10</b>                      | contig00013_2_17_104_397   | cdaps1_C6_LCL     | 33               | 302          | 2.00E-28  | calcium-dependent antibiotic | LCL          | Hybrid       |
| <b>Ketosynthase (KS) domain</b> |                            |                   |                  |              |           |                              |              |              |
| <b>KS1</b>                      | contig00013_1_9_19_446     | bleom_AAG02357_H  | 51               | 432          | 1.00E-104 | bleomycin                    | Hybrid KS    | Hybrid       |

**Fig.S1**

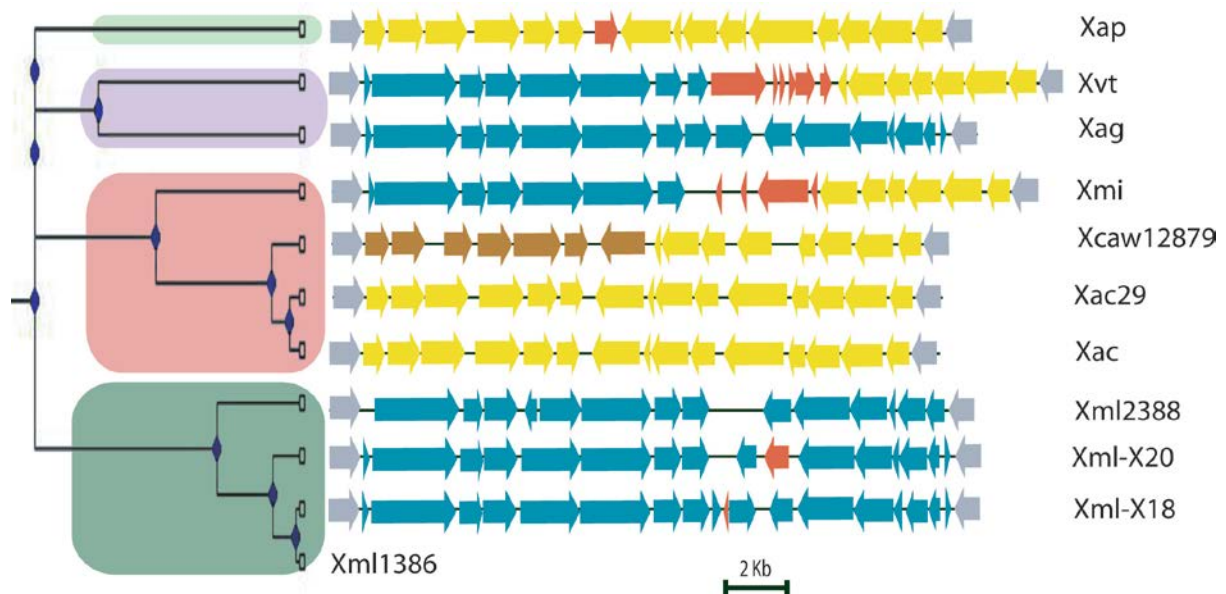

**Fig.S1.** Comparison of Lipopolysaccharide coding gene cluster in *X. axonopodis* pathovars to their evolutionary relationship predicted by clonal frame. Comparison of nucleotide sequences encoding LPS is shown in *X. axonopodis* pv. punicae LMG 859 (Xap), *X. campestris* pv. viticola LMG 965 (Xvt), *X. axonopodis* pv. glycines str. 12-2 (Xag), *X. citri* pv. mangiferaeindicae LMG 941 (Xmi), *X. citri* subsp. citri Aw12879 (Xcaw12879), *X. axonopodis* Xac29-1 (Xac29), *X. axonopodis* pv. citri str. 306 (Xac), *X. axonopodis* pv. malvacearum str. GSPB2388 (Xml2388), *X. citri* pv. malvacearum strain X20 (Xml-20) and X18 (Xml-X18). Different LPS cassettes are coloured differently. All maps are approximately to scale. Red coloured ORFs represent transposable elements.

**Fig.S2**

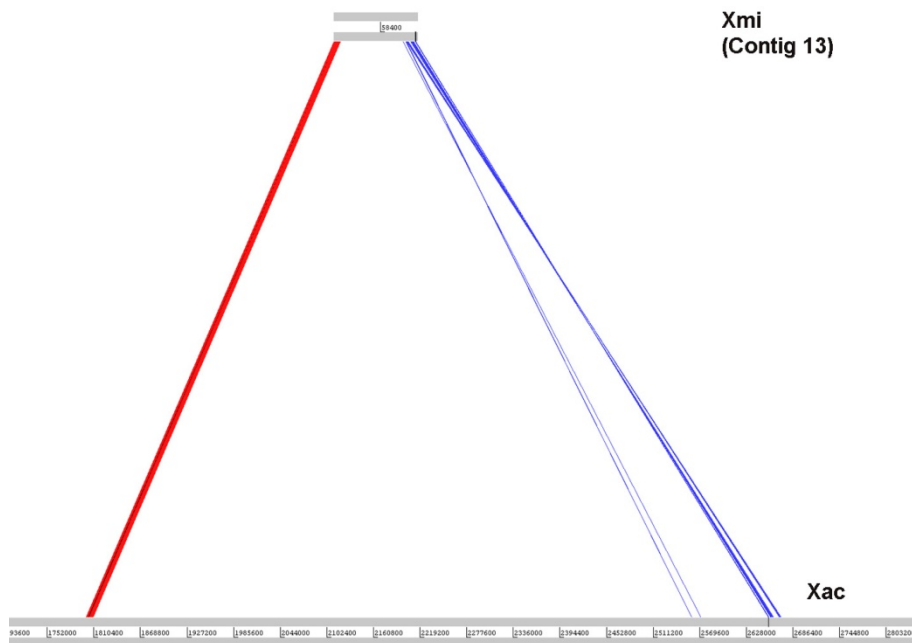

**Fig. S2.** Artemis comparison of Hybrid NRPS-PKS system carrying contig in *X. citri* pv. *mangiferaeindicae* LMG 941 and *X. axonopodis* pv. *citri* str. 306 (Xac). Red colour shows the region of forward matches and blue colour shows the regions of reverse matches.

**Fig.S3**

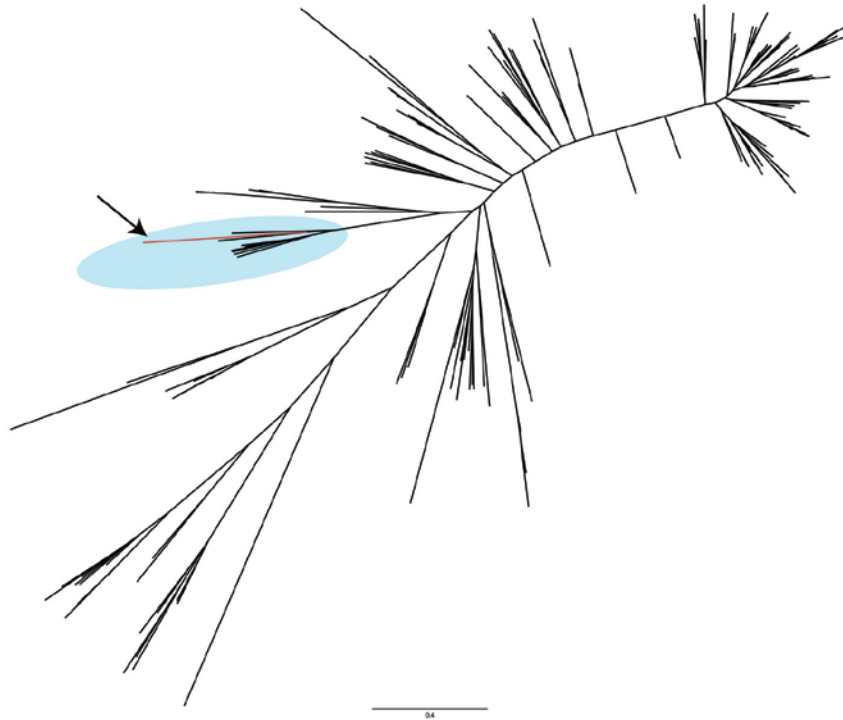

**Fig.S3.** Phylogenetic tree obtained on conserved Ketosynthase (KS) domain of PKS system. Tree was obtained using NaPDoS server taking all database sequences. Clade highlighted in cyan shows the KS domains belonging to Hybrid NRPS-PKS pathways. KS domain of NRPS-PKS system of *X. citri* pv. *mangiferaeindicae* LMG 941 (present study) is coloured in red and marked by a solid black arrowhead.
